# Supplementary material
Source: HighWire-hosted journal article supplement (https://bmjopen.bmj.com/content/14/8/e089265)
Supplement: inline-supplementary-material-1 [file inline-supplementary-material-1.pdf]

## Testing a Persuasive Health Communication Intervention (PHCI) for Emergency Department Patients Who Declined Rapid HIV/HCV Screening: a Randomized Controlled Trial Protocol

### Supplements

Supplement 1: English and Spanish language HIV/HCV PHCI video scripts

Supplement 2: English and Spanish language HIV/HCV PHCI video captions

Supplement 3: Participant HIV/HCV risk questionnaire and intervention persuasiveness questionnaires

### Supplement 1: English and Spanish language HIV/HCV PHCI video scripts

| ACTOR      | English                                                                                                                                                                                                                                                                                                                                                                                                                                                             | Spanish                                                                                                                                                                                                                                                                                                                                                                                                                                                                                                                                                                                                                 |
|------------|---------------------------------------------------------------------------------------------------------------------------------------------------------------------------------------------------------------------------------------------------------------------------------------------------------------------------------------------------------------------------------------------------------------------------------------------------------------------|-------------------------------------------------------------------------------------------------------------------------------------------------------------------------------------------------------------------------------------------------------------------------------------------------------------------------------------------------------------------------------------------------------------------------------------------------------------------------------------------------------------------------------------------------------------------------------------------------------------------------|
| PHYSICIAN: | I heard you said you didn't want to be tested for hepatitis C and HIV. Is that right?                                                                                                                                                                                                                                                                                                                                                                               | * Paciente *, tengo entendido que ha rechazado realizarse las pruebas de VIH y hepatitis C. ¿Es esto correcto?                                                                                                                                                                                                                                                                                                                                                                                                                                                                                                          |
| PATIENT:   | That's right doctor. I don't want to be tested.                                                                                                                                                                                                                                                                                                                                                                                                                     | Sí, así es doctor/a. No quiero hacerme las pruebas                                                                                                                                                                                                                                                                                                                                                                                                                                                                                                                                                                      |
| PHYSICIAN: | Well, I'd like to share some important information to help you understand why I encourage you to get tested for hepatitis C and HIV today. Would that be okay?                                                                                                                                                                                                                                                                                                      | Me gustaría compartir con usted información importante sobre estos test que pueden ayudarle a entender por qué deseo que reconsidere el hacerse estas pruebas hoy. ¿Le parece bien?                                                                                                                                                                                                                                                                                                                                                                                                                                     |
| PATIENT:   | Sure, that's fine.                                                                                                                                                                                                                                                                                                                                                                                                                                                  | Por supuesto, me parece bien.                                                                                                                                                                                                                                                                                                                                                                                                                                                                                                                                                                                           |
| PHYSICIAN: | Okay, well first, testing is easy and fast. You'll get your test results quickly. If your test results show that you are infected, you'll have additional tests to confirm your diagnosis.                                                                                                                                                                                                                                                                          | Me gustaría animarle a que realice las pruebas del VIH y de hepatitis C hoy. Hacerlas es fácil y rápido. Tendrá los resultados rápidamente. Si sus resultados muestran que está infectado, tendrá otros test adicionales para confirmar su diagnóstico.                                                                                                                                                                                                                                                                                                                                                                 |
| PATIENT:   | But do you think testing is really necessary?                                                                                                                                                                                                                                                                                                                                                                                                                       | ¿Pero cree que hacerme las pruebas es de verdad necesario?                                                                                                                                                                                                                                                                                                                                                                                                                                                                                                                                                              |
| PHYSICIAN: | Yes, I really do. You might be infected with hepatitis C or HIV and not even know it. Hepatitis C and HIV are infections that can spread from person to person through sex and injection drug use. Hepatitis C can cause liver damage and even liver cancer. HIV damages the body's immune system that protects people from getting diseases. When the immune system is damaged by HIV, it leads to AIDS. And when someone has AIDS, they can become seriously ill. | Sí, realmente lo creo. El VIH y la Hepatitis C son infecciones que pueden transmitirse de una persona a otra a través del sexo, uso de drogas inyectables y otros medios. Sin tratamiento, el VIH daña el Sistema immune de nuestro cuerpo que nos protege frente a las enfermedades. Cuando el Sistema immune está dañado, desarrolla SIDA. Cuando alguien tiene SIDA, puede enfermar gravemente. Sin tratamiento, la infección por hepatitis C puede provocar daño hepático e incluso cancer de hígado. Realizarse las pruebas es necesario porque puede estar infectado con VIH o hepatitis C y ni siquiera saberlo. |
| PATIENT:   | Oh, I didn't know that.                                                                                                                                                                                                                                                                                                                                                                                                                                             | Oh, no sabía eso.                                                                                                                                                                                                                                                                                                                                                                                                                                                                                                                                                                                                       |
| PHYSICIAN: | So, what do you lose by not getting tested? If you don't get tested, you won't know if you have hepatitis C or HIV. Not knowing if you're infected can be stressful. Plus, if you don't get tested today and you are infected, you delay your chance to treat these infections now and become healthier.                                                                                                                                                            | ¿Qué gana haciéndose las pruebas? Si realiza los test del VIH y hepatitis C, sabrá si está infectado o no. Además, si está infectado/a con VIH o hepatitis C, podemos ayudarle para que reciba el tratamiento más efectivo. Con tratamiento, las personas con VIH tienen la esperanza de vida promedio de cualquier otra persona no infectada. A pesar de que no existe cura para el                                                                                                                                                                                                                                    |

|            |                                                                                                                                                                                                                                                                                                                                                                                                                                                                                                                                                                                                              |                                                                                                                                                                                                                                                                                                                                                                                                                                                                                                                                                                                              |
|------------|--------------------------------------------------------------------------------------------------------------------------------------------------------------------------------------------------------------------------------------------------------------------------------------------------------------------------------------------------------------------------------------------------------------------------------------------------------------------------------------------------------------------------------------------------------------------------------------------------------------|----------------------------------------------------------------------------------------------------------------------------------------------------------------------------------------------------------------------------------------------------------------------------------------------------------------------------------------------------------------------------------------------------------------------------------------------------------------------------------------------------------------------------------------------------------------------------------------------|
|            | You'll also lose the chance to keep your loved ones and others from getting infected.                                                                                                                                                                                                                                                                                                                                                                                                                                                                                                                        | VIH, hay una cura disponible para la hepatitis C. Hacerse las pruebas le ayuda a tomar el control de su salud. También le alienta a tomar las precauciones necesarias para prevenir la transmisión de la infección a sus seres cercanos, así como a tener relaciones sexuales seguras y a no compartir agujas de inyección.                                                                                                                                                                                                                                                                  |
| PATIENT:   | I didn't know that either.                                                                                                                                                                                                                                                                                                                                                                                                                                                                                                                                                                                   | Esto tampoco lo sabía.                                                                                                                                                                                                                                                                                                                                                                                                                                                                                                                                                                       |
| PHYSICIAN: | And so what do you gain by getting tested for hepatitis C and HIV? You'll know if you're infected or not. If you are infected, we can help you get highly effective treatment. There's actually a cure available for hepatitis C. And although there's no cure for HIV, people living with HIV who get treatment can expect to live as long as an average person. Getting tested today helps you take control of your health. It also encourages you to take necessary precautions, such as having safer sex and not sharing injection needles, to prevent spreading these infections to those close to you. | ¿Qué pierde si no se hace las pruebas? Si no se hace el test, no sabrá si está infectado/a de VIH o hepatitis. No saber si tiene la infección puede ser estresante. Si no se hace la prueba hoy, retrasa la oportunidad que tiene de tratar estas infecciones desde este mismo momento. Además, también pierde la oportunidad de proteger a sus seres más queridos y a otras personas de contagiarse.                                                                                                                                                                                        |
| PATIENT:   | Yes, that's important to me.                                                                                                                                                                                                                                                                                                                                                                                                                                                                                                                                                                                 | Vale, entiendo que no soy el único afectado por esto.                                                                                                                                                                                                                                                                                                                                                                                                                                                                                                                                        |
| PHYSICIAN: | Everyone should be tested for hepatitis C and HIV, even if you don't believe you're at risk for these infections. Getting tested won't make you stay in the emergency department any longer. Your results will be kept strictly confidential. And no matter what your test results are, we'll continue to treat you with dignity and respect. If your test results do show that you are infected, we'll help you get effective treatment. You'll also get the support you need to cope with the challenges of having hepatitis C or HIV.                                                                     | Así es. Todo el mundo debería realizarse las pruebas del VIH y hepatitis C, incluso aunque crea que no tiene riesgo de estar infectado. Hacerse el test no supondrá que tenga que pasar más tiempo en Urgencias. Sus resultados serán estrictamente confidenciales. No importa cuáles sean sus resultados, seguiremos tratándole con dignidad y respeto. Si sus resultados muestran que está infectado/a, le ayudaremos a recibir un tratamiento efectivo. Por nuestra parte, siempre tendrá el apoyo que necesite para lidiar y superar cualquier reto que suponga tener VIH o hepatitis C. |
| PATIENT:   | That's good to know.                                                                                                                                                                                                                                                                                                                                                                                                                                                                                                                                                                                         | Está bien saberlo.                                                                                                                                                                                                                                                                                                                                                                                                                                                                                                                                                                           |
| PHYSICIAN: | Do you have questions about the information I gave you or questions on why you should be tested for hepatitis C and HIV?                                                                                                                                                                                                                                                                                                                                                                                                                                                                                     | ¿Tiene preguntas sobre la información que le di o preguntas sobre por qué debería hacerse la prueba de hepatitis C y VIH?                                                                                                                                                                                                                                                                                                                                                                                                                                                                    |
| PATIENT:   | No, doctor.                                                                                                                                                                                                                                                                                                                                                                                                                                                                                                                                                                                                  | No doctor/a.                                                                                                                                                                                                                                                                                                                                                                                                                                                                                                                                                                                 |

|            |                                                                                        |                                                                                                                                                             |
|------------|----------------------------------------------------------------------------------------|-------------------------------------------------------------------------------------------------------------------------------------------------------------|
| PHYSICIAN: | We have quick and easy tests that you can have right now. Will you agree to be tested? | Disponemos de pruebas fáciles y rápidas que podría realizarse ahora mismo. Con la información que acabo de darle ahora, ¿estaría de acuerdo en realizarlas? |
| PATIENT:   | Sure, let's do it.                                                                     | Por supuesto, vamos a hacerlas.                                                                                                                             |
| PHYSICIAN: | I am so glad you agreed to be tested. Thank you.                                       | Me alegra que esté de acuerdo en hacérselas. Gracias, *paciente*.                                                                                           |
| PATIENT:   | Thank you, doctor.                                                                     | Gracias, doctor/a.                                                                                                                                          |

**Supplement 2: English and Spanish language HIV/HCV PHCI video captions**

| Time stamps | English video captions                                                                  | Spanish video captions                                                                                       |
|-------------|-----------------------------------------------------------------------------------------|--------------------------------------------------------------------------------------------------------------|
| 0:12-0:16   | You should get tested for hepatitis C and HIV today.                                    | Usted debería hacerse las pruebas de hepatitis C y VIH hoy.                                                  |
| 0:21-0:25   | Testing is fast and easy. You will get your results quickly.                            | Hacerse las pruebas es fácil y rápido. Obtendrá los resultados rápidamente.                                  |
| 0:26-0:31   | Positive test results will be confirmed.                                                | Los resultados positivos serán confirmados.                                                                  |
| 0:36-0:40   | You may have hepatitis C or HIV and not know it.                                        | Usted podría tener hepatitis C o VIH y no saberlo.                                                           |
| 0:41-0:49   | Hepatitis C and HIV can be spread from person to person.                                | La hepatitis C y el VIH se pueden transmitir de persona a persona.                                           |
| 0:50-0:54   | Hepatitis C can cause liver damage and liver cancer.                                    | La hepatitis C puede dañar el hígado y causar cáncer de hígado.                                              |
| 0:54-1:05   | HIV damages your immune system and can lead to AIDS.                                    | El VIH daña su sistema inmunológico ("las defensas") y puede llevar al SIDA.                                 |
| 1:06-1:08   | AIDS can make someone seriously ill.                                                    | El SIDA puede enfermar gravemente a las personas.                                                            |
| 1:14-1:18   | If you don't get tested, you won't know if you have hepatitis C or HIV.                 | Si no se realiza las pruebas, no sabrá si tiene hepatitis C o VIH.                                           |
| 1:19-1:21   | Not knowing if you have hepatitis C or HIV can be stressful.                            | No saber si tiene hepatitis C o VIH puede ser estresante.                                                    |
| 1:22-1:27   | Not getting tested delays your chance to get treatment and become healthier.            | No realizarse las pruebas retrasa la oportunidad de recibir tratamiento y de mejorar su salud.               |
| 1:27-1:32   | You also lose the chance to protect your loved ones and others from getting infected.   | Usted también perdería la oportunidad de proteger a sus seres queridos y a otras personas de ser infectadas. |
| 1:37-1:40   | By getting tested you will know if you have hepatitis C or HIV.                         | Al realizarse las pruebas, usted sabrá si tiene hepatitis C o VIH.                                           |
| 1:40-1:45   | You can get highly effective treatment.                                                 | Usted puede recibir un tratamiento altamente efectivo.                                                       |
| 1:45-1:47   | There is a cure available for hepatitis C.                                              | Existe una cura disponible para la hepatitis C.                                                              |
| 1:50-1:56   | People living with HIV can get treatment so they can live as long as an average person. | Las personas con VIH que reciben tratamiento pueden vivir tanto como una persona promedio.                   |

|           |                                                                                               |                                                                                                               |
|-----------|-----------------------------------------------------------------------------------------------|---------------------------------------------------------------------------------------------------------------|
| 1:57-2:00 | By getting tested, you can take control of your health.                                       | Al realizarse las pruebas, usted puede tomar control de su salud.                                             |
| 2:01-2:10 | You also can take precautions to prevent spreading hepatitis C and HIV to those close to you. | Usted también puede tomar precauciones para evitar transmitir hepatitis C y VIH a las personas que le rodean. |
| 2:14-2:18 | Everyone should be tested for hepatitis C and HIV.                                            | Todo el mundo debería realizarse las pruebas de hepatitis C y VIH.                                            |
| 2:22-2:27 | You will not stay longer in the emergency department after you get tested.                    | Usted no permanecerá más tiempo en el departamento de emergencias después de hacerse las pruebas.             |
| 2:28-2:30 | Your test results will be kept strictly confidential.                                         | Los resultados de sus pruebas se mantendrán estrictamente confidenciales.                                     |
| 2:33-2:36 | You will be treated with dignity and respect.                                                 | Usted será tratado con dignidad y respeto.                                                                    |
| 2:39-2:41 | You will get effective treatment.                                                             | Usted obtendrá un tratamiento efectivo.                                                                       |
| 2:42-2:47 | You will get the support you need.                                                            | Usted recibirá el apoyo que necesite.                                                                         |

Supplement 3: Participant HIV/HCV risk questionnaire and intervention persuasiveness questionnaires

Consent

[CONSENT]

Obtain consent using IRB-approved consent form.

O1.      Do you agree to be part of the study?      1      Yes

0      No

1      Yes

0      No

If O1a is not equal to O1 then These responses are inconsistent. Please correct. and skip to O1.

If O1 is equal to 0, then skip to STA3.

O1b.      Subject ID For Eligible      \_ \_ \_ \_ \_

Randomization

Please consult secure website at [www.randomize.net](http://www.randomize.net) in order to assign participant to correct study arm.

Please have your Login ID and Password ready.

Randomize participant into:

- Current IDU, Health educator
- Former IDU, Health educator
- Never IDU, Health educator
- Current IDU, Video without captions
- Former IDU, Video without captions
- Never IDU, Video without captions
- Current IDU, Video with captions
- Former IDU, Video with captions
- Never IDU, Video with captions

O2.      Participant was randomized into: (Check one)      01      Current IDU, Health educator

02      Former IDU, Health educator

03      Never IDU, Health educator

04      Current IDU, Video without captions

05      Former IDU, Video without captions

06      Never IDU, Video without captions

07      Current IDU, Video with captions

08      Former IDU, Video with captions

09      Never IDU, Video with captions

99      RA only, skip to DROP

O2a.

Participant was randomized into:2 (Check one)

01

Current IDU, Health educator

02

Former IDU, Health educator

03

Never IDU, Health educator

04

Current IDU, Video without captions

05

Former IDU, Video without captions

06

Never IDU, Video without captions

07

Current IDU, Video with captions

08

Former IDU, Video with captions

09

Never IDU, Video with captions

99

RA only, skip to DROP

*If O2\_1 is not equal to O2\_2 then These responses are inconsistent. Please correct. and skip to O2.*

*If O2 is equal to "RA only, skip to DROP", then skip to STA2.*

**Contact Health Educator to come to the ED for the intervention.**

O3.

Health educator has been contacted

1

Yes

0

No

*If O3 is equal to 0, then skip to STA4.*

O4.

Health educator has arrived to ED room to deliver intervention.

1

Yes

0

No

*If O4 is equal to 0, then skip to STA4.*

*If O2 is equal to 1 or O2 is equal to 2 or O2 is equal to 3, then skip to O5.*

*If O2 is equal to 4 or O2 is equal to 5 or O2 is equal to 6 or O2 is equal to 7 or O2 is equal to 8 or O2 is equal to 9, then skip to O7.*

O5.

Health Educator PHCI started?

1

Yes

0

No

9

RA only, skip to DROP

O5a.

Health Educator PHCI started?2

1

Yes

0

No

9

RA only, skip to DROP

*If O5\_1 is not equal to O5\_2 then These responses are inconsistent. Please correct. and skip to O5.*

*If O5 is equal to 0, then skip to STA4.*

*If O5 is equal to "RA only, skip to DROP", then skip to STA2.*

O6.

Health Educator PHCI finished? (Check one)

0

No

1

Yes

8

Did not watch

9

RA only, skip to DROP

|      |                                             |   |                       |
|------|---------------------------------------------|---|-----------------------|
| O6a. | Health Educator PHCI finished?2 (Check one) | 0 | No                    |
|      |                                             | 1 | Yes                   |
|      |                                             | 8 | Did not watch         |
|      |                                             | 9 | RA only, skip to DROP |

***If O6\_1 is not equal to O6\_2 then These responses are inconsistent. Please correct. and skip to O6.***

***If O6 is equal to 1 or O6 is equal to 0 or O6 is equal to 8, then skip to instruction before O9a.***

***If O6 is equal to "RA only, skip to DROP", then skip to STA2.***

|      |                 |   |                       |
|------|-----------------|---|-----------------------|
| O7.  | Video started?  | 1 | Yes                   |
|      |                 | 0 | No                    |
|      |                 | 9 | RA only, skip to DROP |
| O7a. | Video started?2 | 1 | Yes                   |
|      |                 | 0 | No                    |
|      |                 | 9 | RA only, skip to DROP |

***If O7\_1 is not equal to O7\_2 then These responses are inconsistent. Please correct. and skip to O7.***

***If O7 is equal to 0, then skip to STA4.***

***If O7 is equal to "RA only, skip to DROP", then skip to STA2.***

|      |                              |   |                       |
|------|------------------------------|---|-----------------------|
| O8.  | Video finished? (Check one)  | 0 | No                    |
|      |                              | 1 | Yes                   |
|      |                              | 8 | Did not watch         |
|      |                              | 9 | RA only, skip to DROP |
| O8a. | Video finished?2 (Check one) | 0 | No                    |
|      |                              | 1 | Yes                   |
|      |                              | 8 | Did not watch         |
|      |                              | 9 | RA only, skip to DROP |

***If O8\_1 is not equal to O8\_2 then These responses are inconsistent. Please correct. and skip to O8.***

***If O8 is equal to 1 or O8 is equal to 0 or O8 is equal to 8, then skip to instruction before O9a.***

***If O8 is equal to "RA only, skip to DROP", then skip to STA2.***

***If HIS6 is equal to 1 and HIS1 is equal to 0, then skip to O9a.***

***If HIS6 is equal to 1 and HIS1 is equal to "Don't Know", then skip to O9a.***

***If HIS6 is equal to 1 and HIS2 is equal to 0, then skip to O9a.***

***If HIS5 is equal to 1 and HIS1 is equal to 0, then skip to O9a.***

***If HIS5 is equal to 1 and HIS1 is equal to "Don't Know", then skip to O9a.***

***If HIS5 is equal to 1 and HIS2 is equal to 0, then skip to O9a.***

***If HIS3 is equal to 1 and HIS4 is equal to 0, then skip to O9b.***

***If HIS3 is equal to 1 and HIS4 is equal to "Don't Know", then skip to O9b.***

***If HIS3 is equal to 1 and HIS5 is equal to 0, then skip to O9b.***

***If HIS2 is equal to 1 and HIS4 is equal to 0, then skip to O9b.***

***If HIS2 is equal to 1 and HIS4 is equal to "Don't Know", then skip to O9b.***

***If HIS2 is equal to 1 and HIS5 is equal to 0, then skip to O9b.***

***If HIS4 is equal to 0 and HIS1 is equal to 0, then skip to O9c.***

***If HIS4 is equal to 0 and HIS1 is equal to "Don't Know", then skip to O9c.***

***If HIS4 is equal to 0 and HIS2 is equal to 0, then skip to O9c.***

***If HIS4 is equal to "Don't Know" and HIS1 is equal to 0, then skip to O9c.***

***If HIS4 is equal to "Don't Know" and HIS1 is equal to "Don't Know", then skip to O9c.***

***If HIS4 is equal to "Don't Know" and HIS2 is equal to 0, then skip to O9c.***

***If HIS5 is equal to 0 and HIS1 is equal to 0, then skip to O9c.***

***If HIS5 is equal to 0 and HIS1 is equal to "Don't Know", then skip to O9c.***

***If HIS5 is equal to 0 and HIS2 is equal to 0, then skip to O9c.***

O9a. Eligible for HCV testing only. Does patient agree to HCV testing? (Check one)

- 0 Accepts HCV
- 1 Declines HCV
- 9 RA only, skip to DROP

O9aa. Eligible for HCV testing only. Does patient agree to HCV testing?2 (Check one)

- 0 Accepts HCV
- 1 Declines HCV
- 9 RA only, skip to DROP

***If O9A\_1 is not equal to O9A\_2 then These responses are inconsistent. Please correct. and skip to O9a.***

***If O9a is equal to "RA only, skip to DROP", then skip to STA2.***

***If O9a is equal to 0, then skip to instruction before FBK1.***

***If O9a is equal to 1, then skip to O10.***

O9b. Eligible for HIV testing only. Does patient agree to HIV testing? (Check one)

- 0 Accepts HIV
- 1 Declines HIV
- 9 RA only, skip to DROP

O9ba. Eligible for HIV testing only. Does patient agree to HIV testing?2 (Check one)

- 0 Accepts HIV
- 1 Declines HIV
- 9 RA only, skip to DROP

***If O9B\_1 is not equal to O9B\_2 then These responses are inconsistent. Please correct. and skip to O9b.***

***If O9b is equal to "RA only, skip to DROP", then skip to STA2.***

***If O9b is equal to 0, then skip to instruction before FBK1.***

***If O9b is equal to 1, then skip to O11.***

O9c. Eligible for HIV and HCV testing. Does patient agree to Hepatitis C and/or HIV testing? (Check one)

|   |                       |
|---|-----------------------|
| 0 | Accepts HCV and HIV   |
| 1 | Accepts HCV only      |
| 2 | Accepts HIV only      |
| 3 | Declines both tests   |
| 9 | RA only, skip to DROP |

O9ca. Eligible for HIV and HCV testing. Does patient agree to Hepatitis C and/or HIV testing?2 (Check one)

|   |                       |
|---|-----------------------|
| 0 | Accepts HCV and HIV   |
| 1 | Accepts HCV only      |
| 2 | Accepts HIV only      |
| 3 | Declines both tests   |
| 9 | RA only, skip to DROP |

*If O9C\_1 is not equal to O9C\_2 then These responses are inconsistent. Please correct. and skip to O9c.*

*If O9c is equal to "RA only, skip to DROP", then skip to STA2.*

*If O9c is equal to 0, then skip to instruction before FBK1.*

*If O9c is equal to 1, then skip to O11.*

***If O9c is equal to 2, then skip to O10.***

O10. What is the main reason why you would prefer not to have an HCV test? (Check one)

|    |                                               |
|----|-----------------------------------------------|
| 01 | I do not believe that I am at risk for HCV    |
| 02 | I do not feel well enough to be tested        |
| 03 | I think being tested for HCV is too stressful |
| 04 | Worried about confidentiality                 |
| 05 | I don't want to know if I have HCV            |
| 06 | I plan to be tested in the future             |
| 07 | I am scared that I have HCV                   |
| 97 | Don't Know                                    |
| 98 | Refuse to Answer                              |
| 99 | RA only, skip to DROP                         |

O10a. What is the main reason why you would prefer not to have an HCV test? 2 (Check one)

- 01 I do not believe that I am at risk for HCV
- 02 I do not feel well enough to be tested
- 03 I think being tested for HCV is too stressful
- 04 Worried about confidentiality
- 05 I don't want to know if I have HCV
- 06 I plan to be tested in the future
- 07 I am scared that I have HCV
- 97 Don't Know
- 98 Refuse to Answer
- 99 RA only, skip to DROP

***If O10\_1 is not equal to O10\_2 then These responses are inconsistent. Please correct. and skip to O10.***

***If O10 is equal to "RA only, skip to DROP", then skip to STA2.***

***If O9c is equal to 2, then skip to instruction before FBK1.***

***If O9a is equal to 1, then skip to instruction before FBK1.***

O11. What is the main reason why you would prefer not to have an HIV test? (Check one)

- 01 I do not believe that I am at risk for HIV
- 02 I do not feel well enough to be tested
- 03 I think being tested for HIV is too stressful
- 04 Worried about confidentiality
- 05 I don't want to know if I have HIV
- 06 I plan to be tested in the future
- 07 I am scared that I have HIV
- 97 Don't Know
- 98 Refuse to Answer
- 99 RA only, skip to DROP

O11a. What is the main reason why you would prefer not to have an HIV test? 2 (Check one)

- 01 I do not believe that I am at risk for HIV
- 02 I do not feel well enough to be tested
- 03 I think being tested for HIV is too stressful
- 04 Worried about confidentiality
- 05 I don't want to know if I have HIV
- 06 I plan to be tested in the future
- 07 I am scared that I have HIV
- 97 Don't Know
- 98 Refuse to Answer
- 99 RA only, skip to DROP

***If O11\_1 is not equal to O11\_2 then These responses are inconsistent. Please correct. and skip to O11.***

***If O11 is equal to "RA only, skip to DROP", then skip to STA2.***

Video/Message feedback

[FEEDBACK]  
Video/Message feedback

Now we would like to ask you three questions about the video/message. First, we will ask how much the video/message convinced you to get tested. Second, how much the video/message motivated you to get tested. And third, how much the video/message respected your choice to get tested.

- FBK1. How much did the (video/message) convince you to get tested for Hepatitis C and/or HIV? By convince, we mean change your opinion to get tested. (Check one)
- 0

Not at all
- 1

Not much
- 2

Somewhat
- 3

Pretty much
- 4

Very much
- 7

Don't Know
- 8

Refuse to Answer
- 9

RA only, skip to

DROP

- FBK1a. How much did the (video/message) convince you to get tested for Hepatitis C and/or HIV? By convince, we mean change your opinion to get tested. 2 (Check one)
- 0

Not at all
- 1

Not much
- 2

Somewhat
- 3

Pretty much
- 4

Very much
- 7

Don't Know
- 8

Refuse to Answer
- 9

RA only, skip to

DROP

*If F1\_1 is not equal to F1\_2 then These responses are inconsistent. Please correct. and skip to FBK1.*  
*If FBK1 is equal to "RA only, skip to DROP", then skip to STA2.*

FBK2. How much did the (video / message) motivate you to get tested for Hepatitis C and/or HIV? By motivate, we mean make you want to get tested. (Check one)

- 0 Not at all
- 1 Not much
- 2 Somewhat
- 3 Pretty much
- 4 Very much
- 7 Don't Know
- 8 Refuse to Answer
- 9 RA only, skip to

DROP

FBK2a. How much did the (video / message) motivate you to get tested for Hepatitis C and/or HIV? By motivate, we mean make you want to get tested. 2 (Check one)

- 0 Not at all
- 1 Not much
- 2 Somewhat
- 3 Pretty much
- 4 Very much
- 7 Don't Know
- 8 Refuse to Answer
- 9 RA only, skip to

DROP

*If F2\_1 is not equal to F2\_2 then These responses are inconsistent. Please correct. and skip to FBK2.*

*If FBK2 is equal to "RA only, skip to DROP", then skip to STA2.*

FBK3. How much did the (video/message) respect your choice to get tested for Hepatitis C and/or HIV? (Check one)

- 0 Not at all
- 1 Not much
- 2 Somewhat
- 3 Pretty much
- 4 Very much
- 7 Don't Know
- 8 Refuse to Answer
- 9 RA only, skip to

DROP

FBK3a. How much did the (video/message) respect your choice to get tested for Hepatitis C and/or HIV? 2 (Check one)

- 0Not at all
- 1Not much
- 2Somewhat
- 3Pretty much
- 4Very much
- 7Don't Know
- 8Refuse to Answer
- 9RA only, skip to

DROP

*If F3\_1 is not equal to F3\_2 then These responses are inconsistent. Please correct. and skip to FBK3.*

*If FBK3 is equal to "RA only, skip to DROP", then skip to STA2.*

We will now ask you about your risk for a Hepatitis C and HIV infection from injecting drugs or having sex.

For these questions, we would like you to answer them on the tablet computer. You will see the questions on the screen and hear them through the headphones. I would like to show you a sample question and ask you to answer it on the computer.

FBK4. Do you have a pet?

- 1
- Yes
- 0
- No

We now would like to ask you some questions about your risk of Hepatitis C or HIV from drugs or sex.

Risk factors (Audio)

RSK1. Have you ever injected drugs for non-medical use (such as: heroin, cocaine, crystal meth, steroids)?

- 1Yes
- 0No
- 7Don't Know
- 8Refuse to Answer
- 9RA only, skip to

DROP

*If RSK1 is equal to "RA only, skip to DROP", then skip to STA2.*

*If RSK1 is equal to 0 or RSK1 is equal to "Don't Know" or RSK1 is equal to "Refuse to Answer", then skip to RSK3.*

RSK2. When you injected drugs, have you ever shared needles, syringes, water, cotton or cookers with anyone?

- 1 Yes
- 0 No
- 7 Don't Know
- 8 Refuse to Answer
- 9 RA only, skip to

DROP

*If RSK2 is equal to "RA only, skip to DROP", then skip to STA2.*

RSK3. Have you ever inhaled drugs for non-medical use (such as: heroin, cocaine, crack)?

- 1 Yes
- 0 No
- 7 Don't Know
- 8 Refuse to Answer
- 9 RA only, skip to

DROP

*If RSK3 is equal to "RA only, skip to DROP", then skip to STA2.*

RSK4. Have you ever gotten a tattoo from a needle that might not have been sterile?

- 1 Yes
- 0 No
- 7 Don't Know
- 8 Refuse to Answer
- 9 RA only, skip to

DROP

*If RSK4 is equal to "RA only, skip to DROP", then skip to STA2.*

RSK5. Have you ever gotten a piercing from equipment that might not have been sterile?

- 1 Yes
- 0 No
- 7 Don't Know
- 8 Refuse to Answer
- 9 RA only, skip to

DROP

*If RSK5 is equal to "RA only, skip to DROP", then skip to STA2.*

*If C\_3 is not less than 1992, then skip to instruction before RSK8.*

RSK6. Have you ever had a blood transfusion before 1992?

- 1 Yes
- 0 No
- 7 Don't Know
- 8 Refuse to Answer
- 9 RA only, skip to

DROP

***If RSK6 is equal to "RA only, skip to DROP", then skip to STA2.***

- RSK7. Have you ever had an organ transplant before 1992?
- 1

0

7

8

9
- Yes

No

Don't Know

Refuse to Answer

RA only, skip to

DROP

***If RSK7 is equal to "RA only, skip to DROP", then skip to STA2.***

***If C\_3 is not less than 1987, then skip to RSK9.***

- RSK8. Did you ever receive blood clotting factors, such as factor 8 or factor 9, before 1987?
- 1

0

7

8

9
- Yes

No

Don't Know

Refuse to Answer

RA only, skip to

DROP

***If RSK8 is equal to "RA only, skip to DROP", then skip to STA2.***

- RSK9. Did your mother have Hepatitis C when you were born?
- 1

0

7

8

9
- Yes

No

Don't Know

Refuse to Answer

RA only, skip to

DROP

***If RSK9 is equal to "RA only, skip to DROP", then skip to STA2.***

- RSK10. Have you ever been in prison or jail even if it was for a short time?
- 1

0

7

8

9
- Yes

No

Don't Know

Refuse to Answer

RA only, skip to

DROP

***If RSK10 is equal to "RA only, skip to DROP", then skip to STA2.***

- RSK11. Have you ever had dialysis?
- 1

0

7

8

9
- Yes

No

Don't Know

Refuse to Answer

RA only, skip to

DROP

***If RSK11 is equal to "RA only, skip to DROP", then skip to STA2.***

RSK12. Have you ever had sexual intercourse with someone who you think or you know had Hepatitis C?

- 1 Yes
- 0 No
- 7 Don't Know
- 8 Refuse to Answer
- 9 RA only, skip to

DROP

*If RSK12 is equal to "RA only, skip to DROP", then skip to STA2.*

RSK13. Have you ever had sexual intercourse with someone who you think or you know had HIV?

- 1 Yes
- 0 No
- 7 Don't Know
- 8 Refuse to Answer
- 9 RA only, skip to

DROP

*If RSK13 is equal to "RA only, skip to DROP", then skip to STA2.*

*If C\_4 is equal to 1 or C\_4 is equal to 3 or C\_4 is equal to 4 or C\_4 is equal to 5 then skip to RSK14*

*If not, then skip to instruction before RSK15.*

RSK14. Have you ever had sex with another man?

- 1 Yes
- 0 No
- 7 Don't Know
- 8 Refuse to Answer
- 9 RA only, skip to

DROP

*If RSK14 is equal to "RA only, skip to DROP", then skip to STA2.*

*If C\_4 is equal to 2 or C\_4 is equal to 3 or C\_4 is equal to 4 or C\_4 is equal to 5 then skip to RSK15*

*If not, then skip to RSK16.*

RSK15. Have you ever had sex with a man who you think had sex with other men?

- 1 Yes
- 0 No
- 7 Don't Know
- 8 Refuse to Answer
- 9 RA only, skip to

DROP

*If RSK15 is equal to "RA only, skip to DROP", then skip to STA2.*

RSK16. Have you ever had a sexually transmitted infection (such as: herpes, gonorrhea, chlamydia, syphilis)?

|   |                  |
|---|------------------|
| 1 | Yes              |
| 0 | No               |
| 7 | Don't Know       |
| 8 | Refuse to Answer |
| 9 | RA only, skip to |

DROP

***If RSK16 is equal to "RA only, skip to DROP", then skip to STA2.***

RSK17. Have you ever had sexual intercourse without a condom?

|   |                  |
|---|------------------|
| 1 | Yes              |
| 0 | No               |
| 7 | Don't Know       |
| 8 | Refuse to Answer |
| 9 | RA only, skip to |

DROP

***If RSK17 is equal to "RA only, skip to DROP", then skip to STA2.***

Thank you for answering our questions!

Please give the computer back to the research coordinator.

***Skip to end of questionnaire.***
